# Supplementary material
Source: Springer Nature journal article supplement (https://www.springermedizin.de/resource/supplementary/12936_2009_1143_MOESM6_ESM.pdf/9549962)

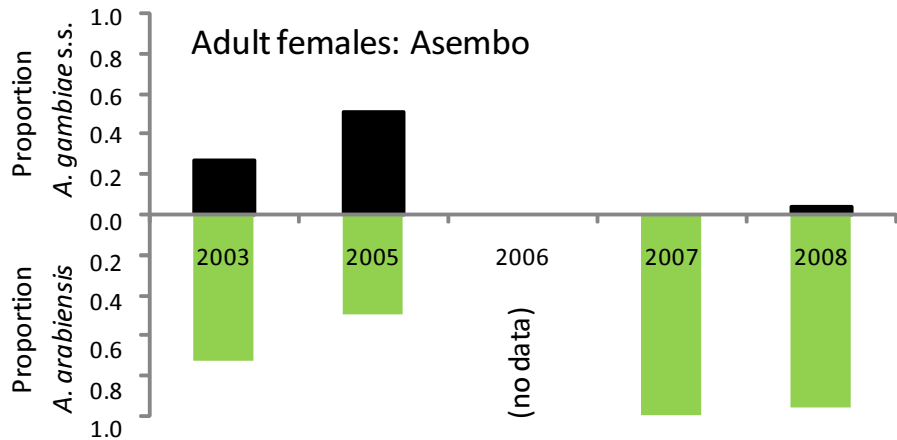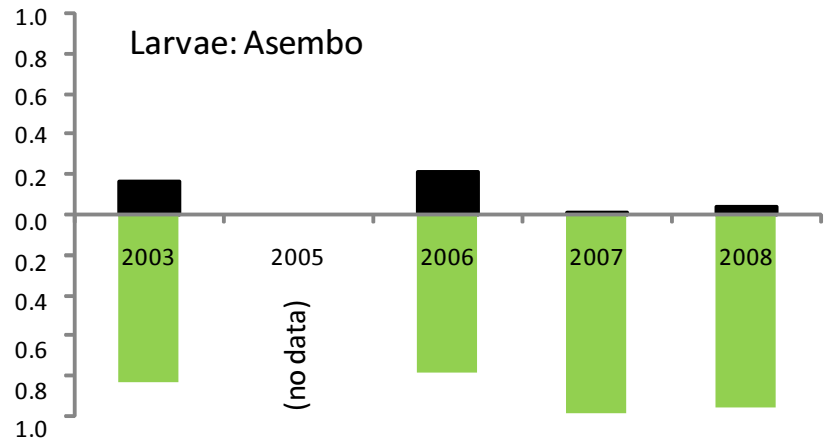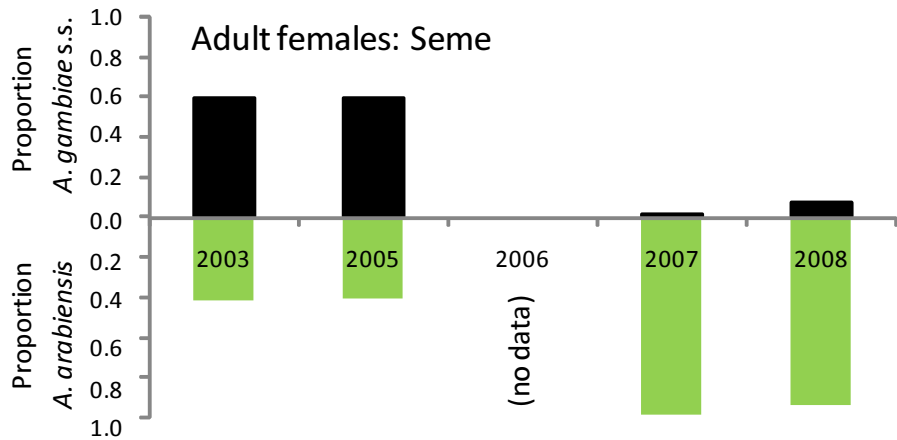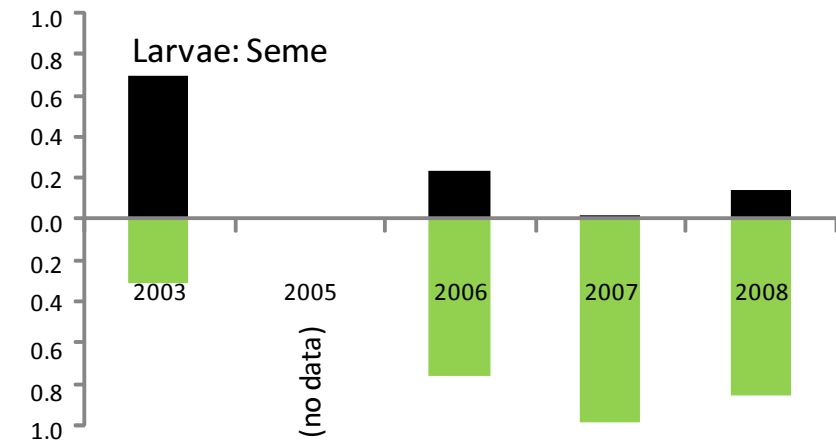

Supplement: MOESM6 [file 9549962]
